# Supplementary material for: Absence of Grail promotes CD8+ T cell anti-tumour activity
Source: PubMed Central journal article supplement (PMC5552797; doi:10.1038/s41467-017-00252-w), 2017-08-10
Supplement: 41467_2017_252_MOESM1_ESM.pdf [file 41467_2017_252_MOESM1_ESM.pdf]

File Name: Supplementary Information  
Description: Supplementary Figures

File Name: Peer Review File  
Description:

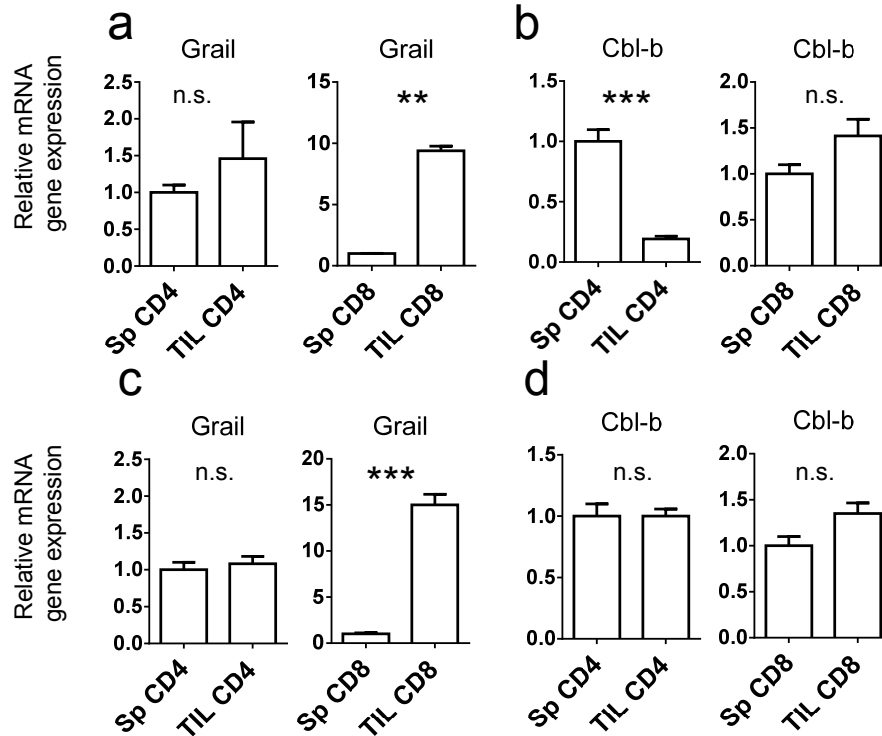

**Supplementary Figure 1: Different expression pattern of Grail and Cbl-b in CD4<sup>+</sup> and CD8<sup>+</sup> T cells from spleen and TILs.** EG-7 (a,b) or EL-4 cells (c,d) were injected subcutaneously into the flanks of wild-type (WT) mice and 17 days later WT CD4<sup>+</sup> and CD8<sup>+</sup> T cells from spleens and TILs were FACS-sorted and restimulated with plate-bound anti-CD3 for 4 hours. The mRNA expression of Grail (a,c) and Cbl-b (b,d) was detected by real time (RT)-PCR analysis. Results for target genes are presented after normalizing to  $\beta$ -actin and shown as mean  $\pm$  sem. All experiments were independently performed twice with 10 mice per group. \*\*  $p < 0.01$ , \*\*\*  $p < 0.001$ , n.s.: not significant as determined using a Student's t test.

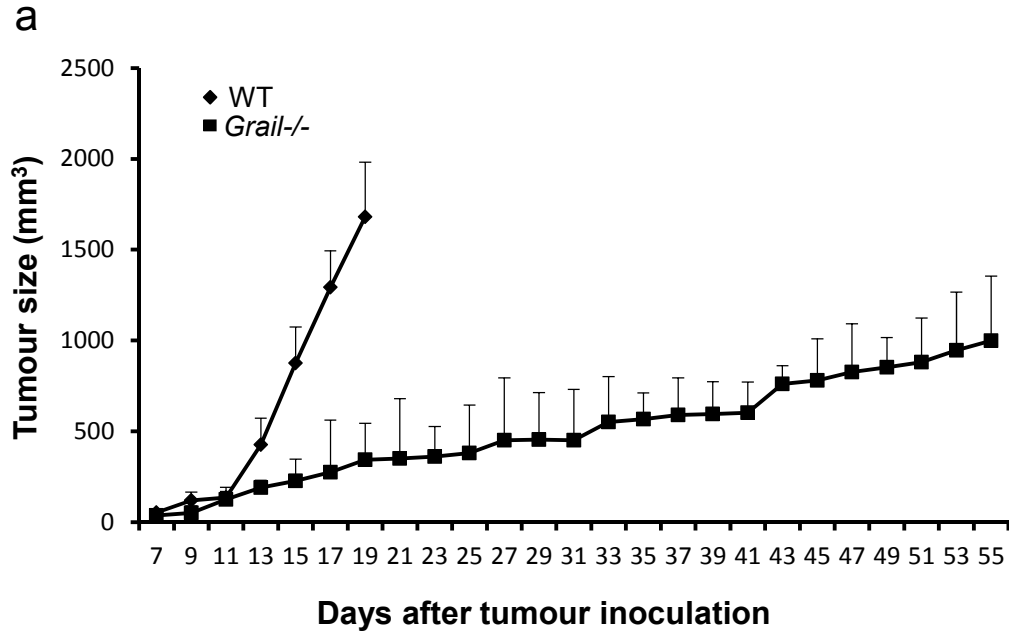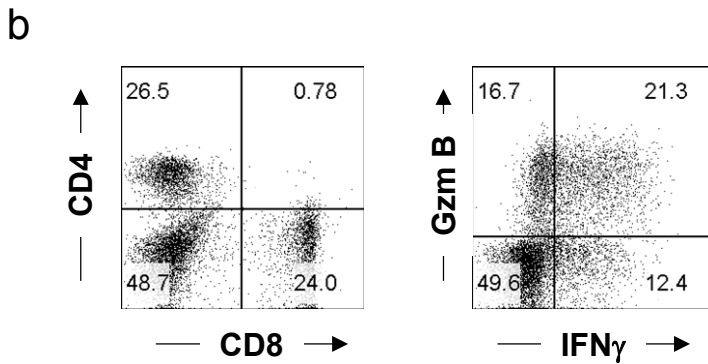

**Supplementary Figure 2: Long-term tumour control is mediated by *Grail* absence.** WT and *Grail*<sup>-/-</sup> mice were inoculated with EG-7 tumours and monitored as described in Fig. 1a. WT mice were euthanized at day 17 due to tumour size and *Grail*<sup>-/-</sup> mice were monitored until day 55. Tumour burden is shown in (a). The frequency of CD4<sup>+</sup> and CD8<sup>+</sup> TIL subsets from *Grail*<sup>-/-</sup> mice at day 55 as well as GrzB and IFNγ expression by CD8<sup>+</sup> TIL is shown in (b). (n=10 mice per group).

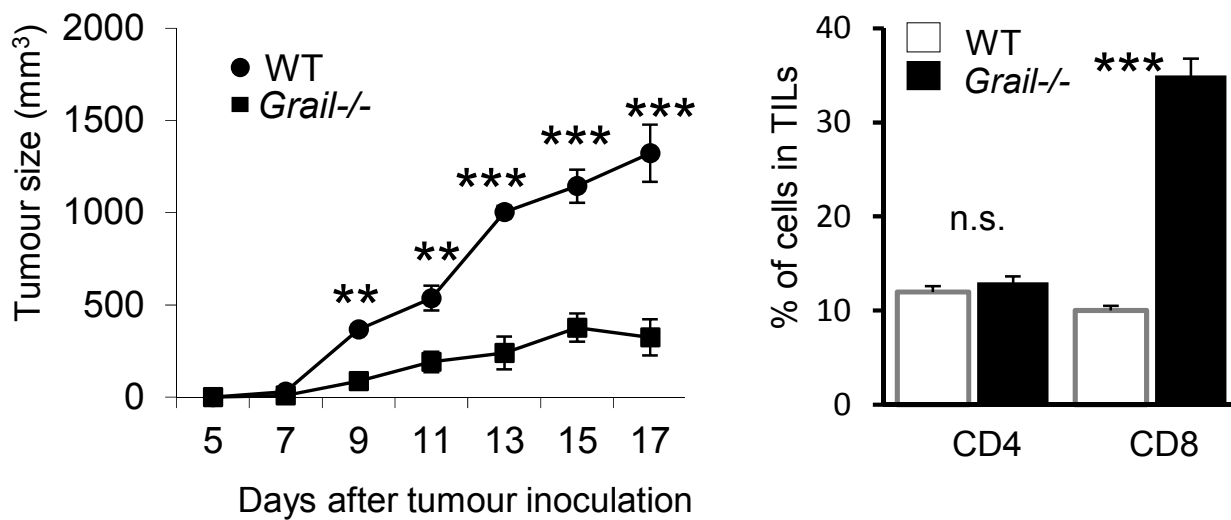

**Supplementary Figure 3: EL-4 lymphoma growth is controlled in *Grail*<sup>-/-</sup> mice.** WT and *Grail*<sup>-/-</sup> mice were injected with EL-4 tumour cells subcutaneously on day 0, and from day 7 tumour growth was monitored and calculated as in Fig.1a (left graph). Tumour infiltrating lymphocytes (TILs) isolated from EL-4 tumours were stained with anti-CD4 and CD8 $\alpha$  antibodies (right bar graph). The graph shows mean  $\pm$  sem. The results shown are representative of three independent experiments with 5-8 mice per group. \*\* p < 0.01, \*\*\* p < 0.0001, n.s.: not significant as determined using a Student's t test.

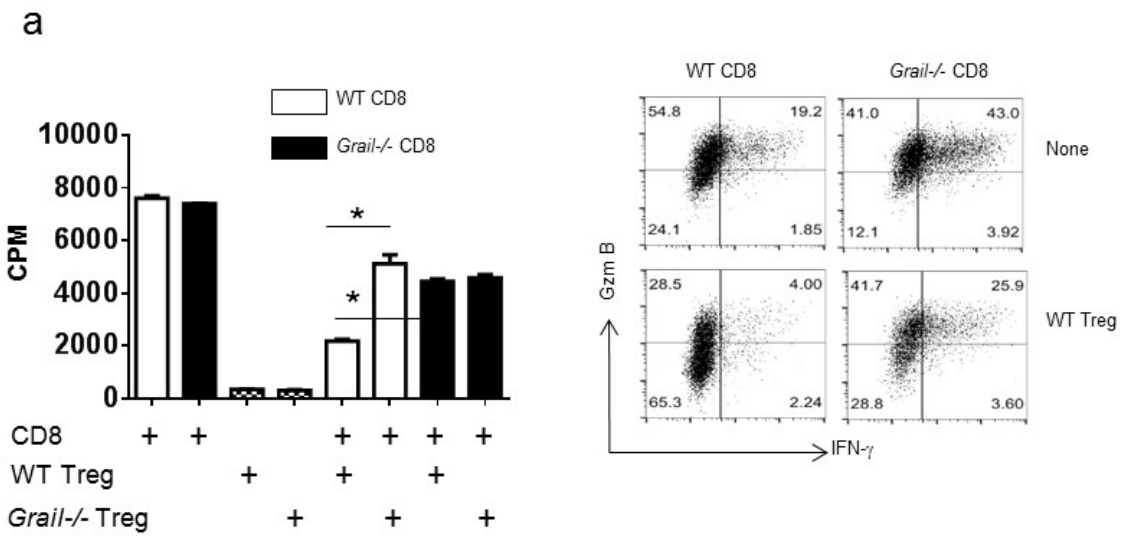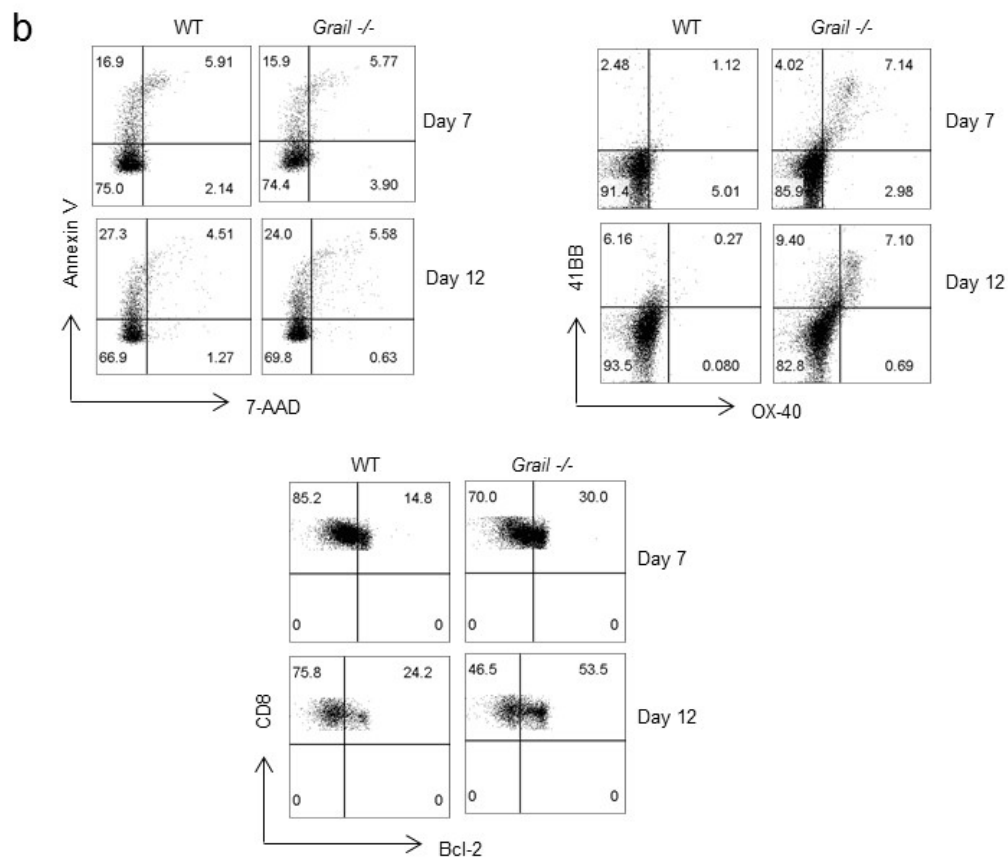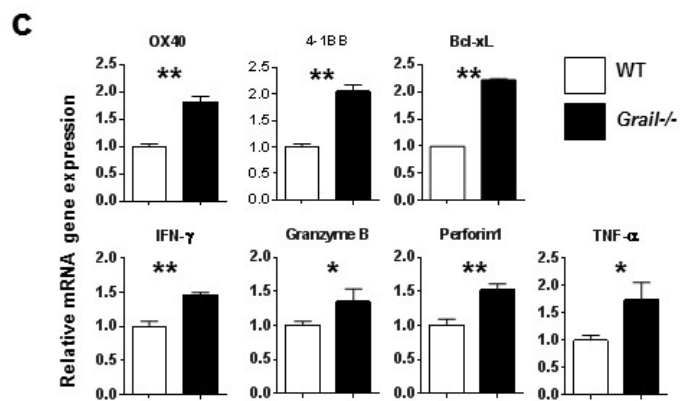

**Supplementary Figure 4: Resistance to Treg suppression in addition to increased activation and functionality of CD8<sup>+</sup> T cells in the absence of Grail.** (a) Naïve WT or *Grail*<sup>-/-</sup> CD8<sup>+</sup> T cells were cultured with or without FACS-sorted WT or *Grail*<sup>-/-</sup> Foxp3-GFP<sup>+</sup>CD4<sup>+</sup> nTreg cells in triplicate wells in the presence of plate-bound anti-CD3 and irradiated WT APCs. Proliferation was assayed 72 hrs after treatment by adding [<sup>3</sup>H]-thymidine to the culture for the last 8 hrs. 2 days later, expression of IFN- $\gamma$  and granzyme B was analyzed by intracellular staining. Numbers in dot plot quadrants represent the percentages. (b) WT and *Grail*<sup>-/-</sup> TIL were isolated from EG-7 tumours on days 7 and 12 and stained with anti-CD8 $\alpha$ , 41BB, OX40, Bcl2, Annexin V antibodies and 7AAD. Numbers in each dot plot indicate the percentage of cells within each quadrant from a representative tumour at each time point and is sub-gated on CD8<sup>+</sup> T cells. The results shown are representative of two independent experiments with 5 mice per group. (c) RT-PCR analysis of mRNA levels of indicated genes in FACS-sorted WT and *Grail*<sup>-/-</sup> CD8<sup>+</sup> T cells from tumours on day 17 following tumour inoculation. Results for target genes are presented after normalizing to  $\beta$ -actin as mean  $\pm$  sem for both groups from 3 independent experiments. \* p < 0.05, \*\* p < 0.01 as determined using a Student's t test.

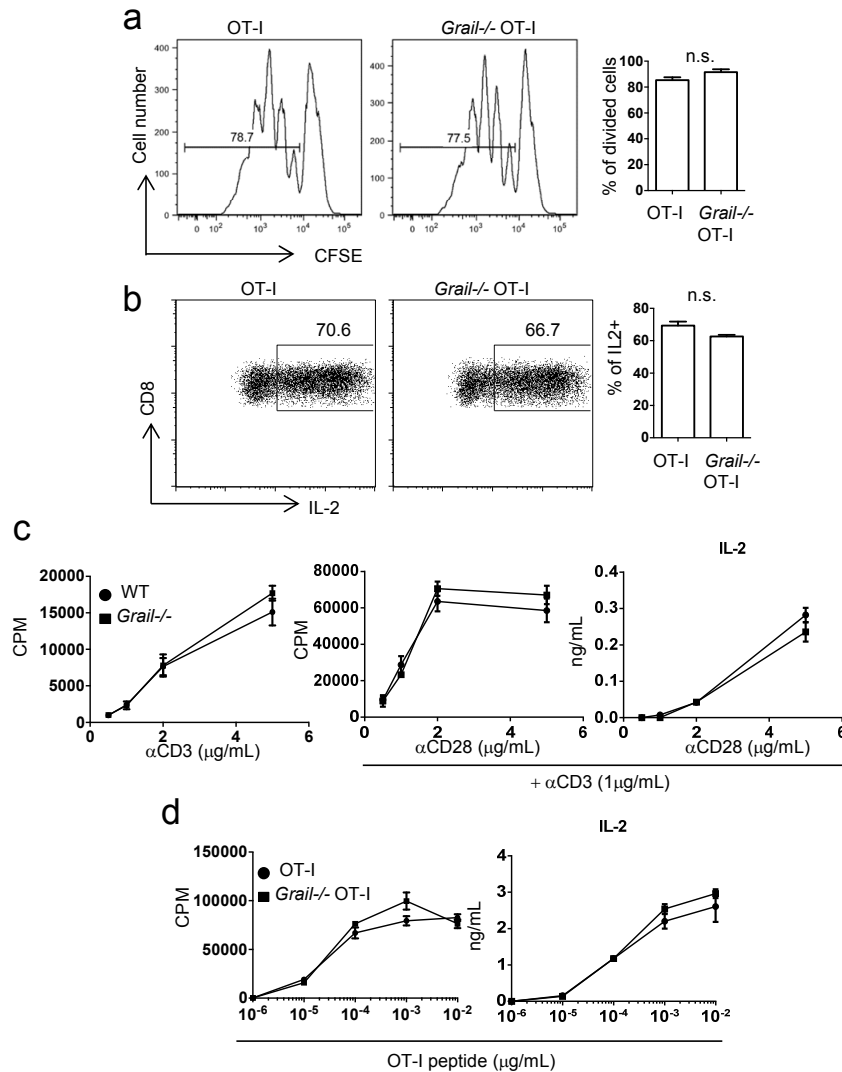

**Supplementary Figure 5: CD8<sup>+</sup> T cell priming in the absence of Grail.** (a-b) Purified CD45.2<sup>+</sup> OT-I and *Grail*<sup>-/-</sup> OT-I cells were labeled with CFSE and transferred into CD45.1<sup>+</sup> congenic mice (3 mice per group) which were injected with EG-7 tumour cells 5 days earlier. 3 days later mice were sacrificed and the draining lymph node cells (DLNs) were analyzed. (a) Percentage of divided donor cells (CD45.2<sup>+</sup>CD8<sup>+</sup>). (b) DLN cells were stimulated for 5 hrs with OVA peptide and IL-2 production was analyzed in the CD45.2<sup>+</sup>CD8<sup>+</sup> gate by intracellular staining. Numbers in dot plot quadrants represent the percentages. (c) FACS-sorted naïve CD8<sup>+</sup> T cells were activated with plate-bound anti-CD3 alone or together with anti-CD28. Proliferation was assayed by adding [<sup>3</sup>H]-thymidine to the culture for the last 8 hours of the 72-hour culture. IL-2 production was measured by ELISA using supernatants collected 24 hr after activation. (d) Naïve OT-I and *Grail*<sup>-/-</sup> OT-I cells were activated with OVA peptide and irradiated WT APCs. Proliferation was assayed by adding [<sup>3</sup>H]-thymidine to the culture for the last 8 hours of the 48-hour culture. IL-2 production was measured by ELISA using supernatants collected 24 hr after activation. The bar graph shows mean ± sem. All experiments were independently performed twice. n.s.: not significant as determined using a Student's t test.

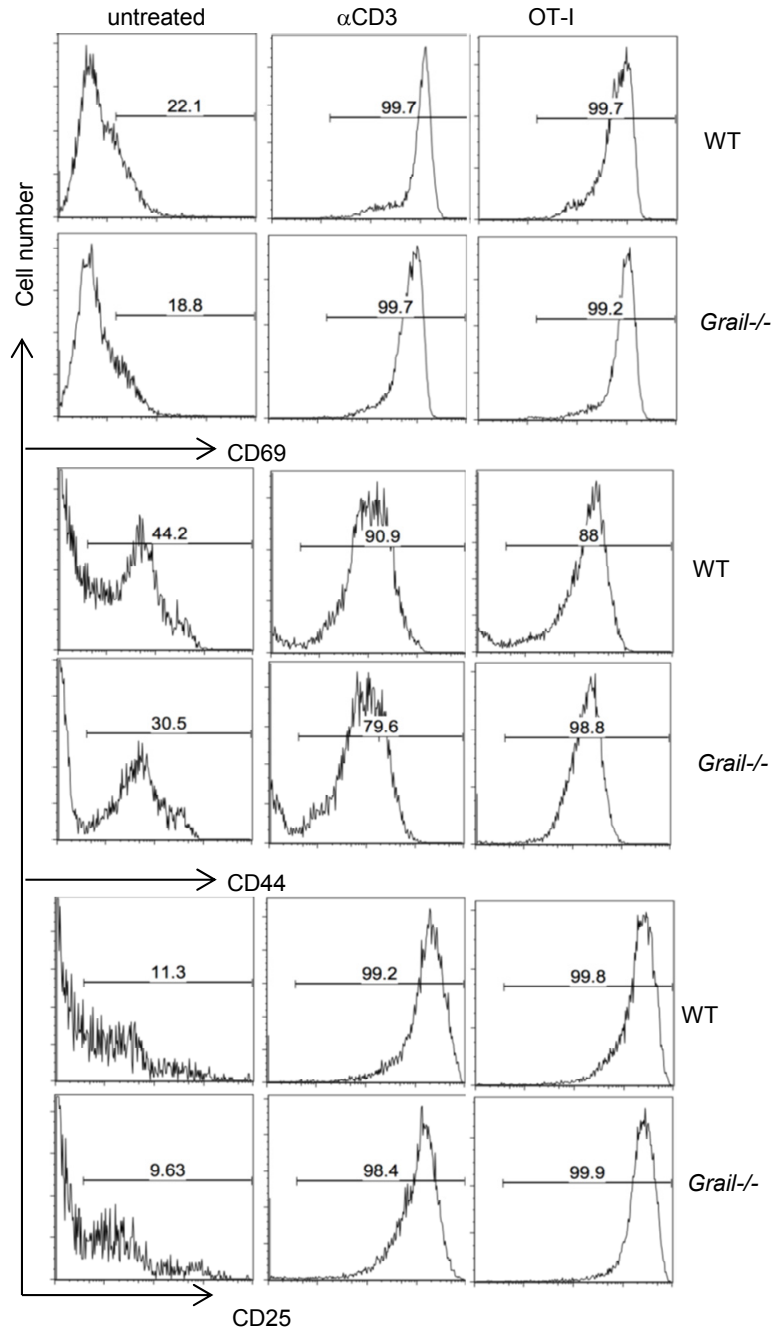

**Supplementary Figure 6: The activation of CD8<sup>+</sup> T cells *in vitro*.** WT and *Grail*<sup>-/-</sup> splenocytes were left untreated or activated in the indicated conditions for 24 hours, followed by surface staining of CD8, CD69, CD44 and CD25. Expression was analyzed in the CD8<sup>+</sup> gate. The gates and numbers indicate the percentage of positive cells. All experiments were independently performed twice.



————— WT CD8<sup>+</sup> T cells —————

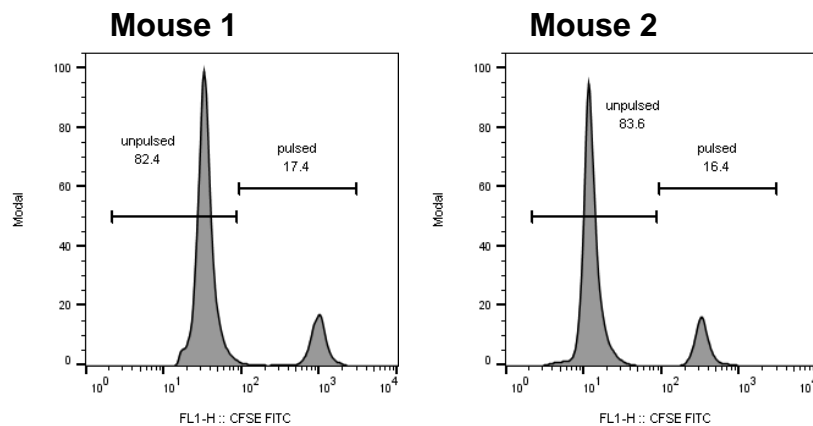

**Supplementary Figure 7: Antigen-specific killing by WT CD8<sup>+</sup> T cells *in vivo*.** Spleen cells from OT-I mice were adoptively transferred into C57BL/6J mice (n=2 mice) followed by s.c. vaccination with OVA peptide and anti-CD40. Imiquimod cream was applied on the vaccination site. In addition, mice received 100,000 IU rhIL-2 by i.p. Three days after vaccination, mice were injected with a 1:1 mix of target cells. Target cells were prepared using splenocytes from C57BL/6 mice either loaded with 1  $\mu\text{g/ml}$  peptide and labeled with 5  $\mu\text{mol/L}$  CFSE or unloaded and labeled with 0.5  $\mu\text{mol/L}$  CFSE. 8 h later, splenocytes from the recipients were analyzed by flow cytometry to assess peptide-specific killing of the CFSE<sup>hi</sup> labeled target cells.

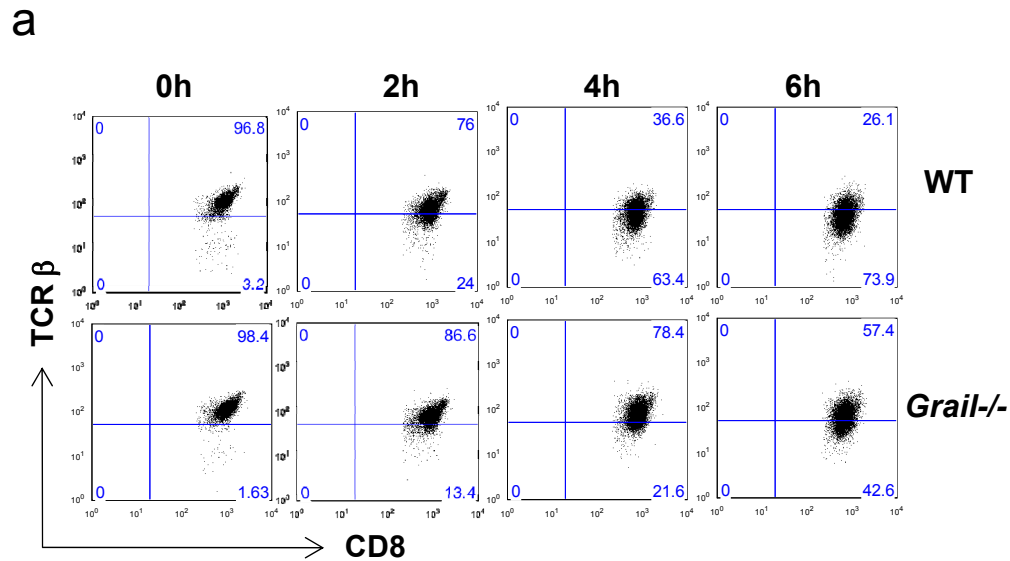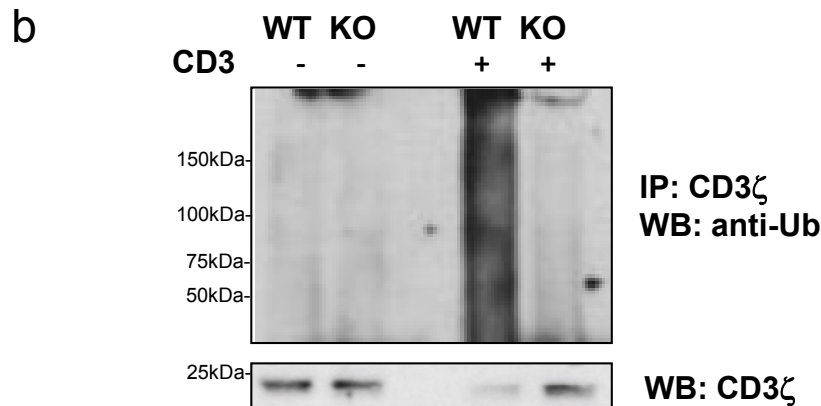

**Supplementary Figure 8: *Grail* controls TCR/CD3 expression in CD8<sup>+</sup> T cells.** (a) Splenic T cells from WT and *Grail*<sup>-/-</sup> OT-I mice were stimulated with OVA peptide and the expression of TCRβ on CD8<sup>+</sup> T cells was determined by flow cytometry. The results shown are representative of two independent experiments. (b) CD8 T cells from WT and *Grail*<sup>-/-</sup> mice were untreated or activated with anti-CD3 for 6 hours. MG-132 was added to all samples for 6 hours. The cell lysates were ip using anti-CD3ζ antibodies. The blot was probed with anti-Ub antibodies, and re-probed with anti-CD3ζ-HRP. The results shown are a representative of three independent experiments.

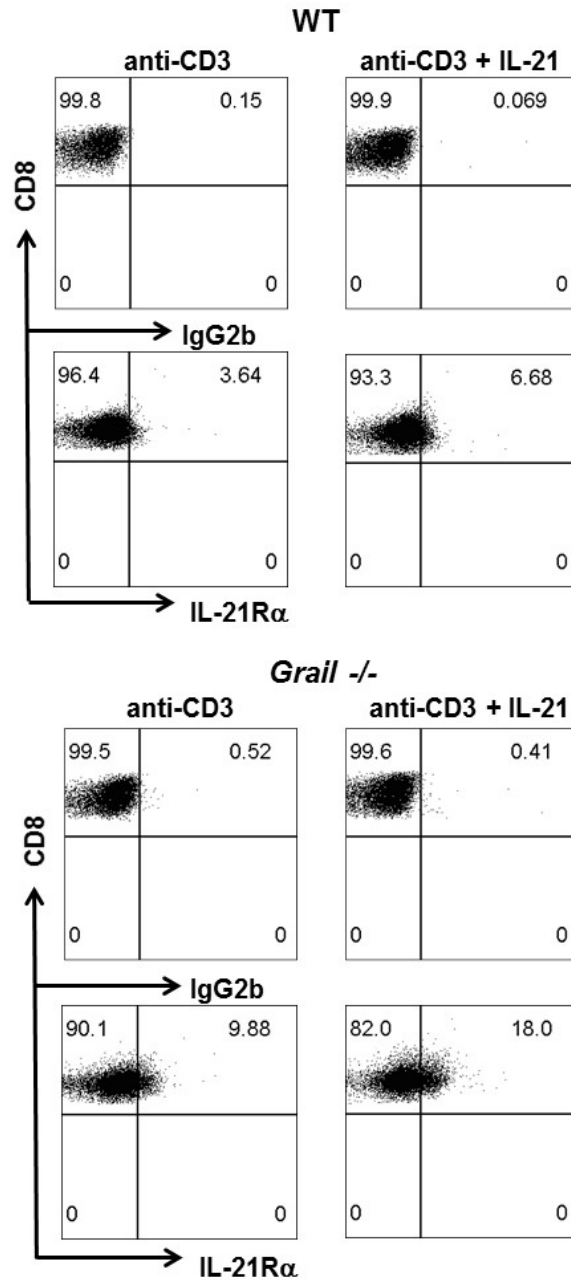

**Supplementary Figure 9: Specificity of IL-21R staining.** Naïve WT and *Grail*<sup>-/-</sup> CD8<sup>+</sup> T cells were stimulated with anti-CD3 in the presence or absence of IL-21 for 3 days. IL-21R expression on CD8<sup>+</sup> T cells was assessed flow cytometry staining with isotype control (rat IgG2b kappa) and IL-21R $\alpha$  antibodies. Numbers in dot plot quadrants represent the percentages of each subset.

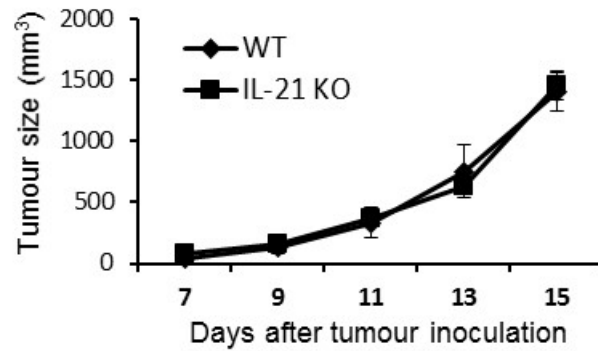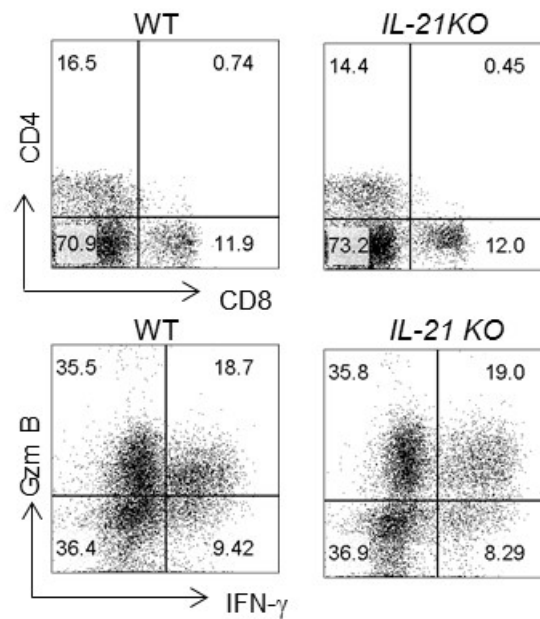

**Supplementary Figure 10: Absence of IL-21 does not influence tumour growth or level of T cell infiltration and functionality.** WT and IL-21KO mice were inoculated with EG-7 tumour cells. Tumour size was measured and calculated as in Figure 1a. TILs were stained and analyzed as described in Figure 1. All experiments were independently performed twice with 7 mice per group.

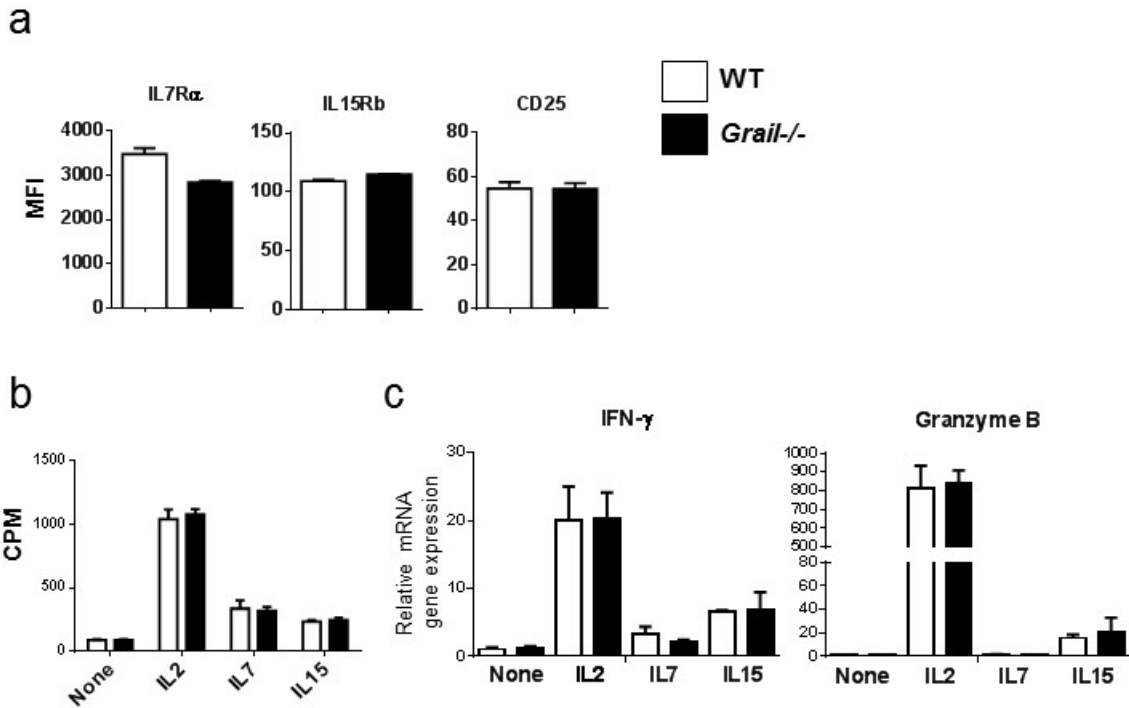

**Supplementary Figure 11: Normal IL-2, IL-7 and IL-15 signaling in naïve *Grail*<sup>-/-</sup> CD8<sup>+</sup> T cells.** (a) Untreated WT and *Grail*<sup>-/-</sup> splenocytes were stained with anti-IL7Rα, IL15Rb, CD25, CD8, and CD44 and analyzed in CD8<sup>+</sup>CD44<sup>neg</sup> gate. (b) Naïve WT and *Grail*<sup>-/-</sup> CD8<sup>+</sup> T cells were activated with anti-CD3 alone or together with IL-2, IL-7 or IL-15 treatment. Proliferation was assayed 72 hrs after treatment by adding [<sup>3</sup>H]-thymidine to the culture for the last 8 hrs. (c) The mRNA gene expression of IFN-γ and Granzyme B 24 hrs after activation was analyzed by RT-PCR. All experiments were independently performed twice. MFI: mean fluorescence intensity, CPM: count per minute.

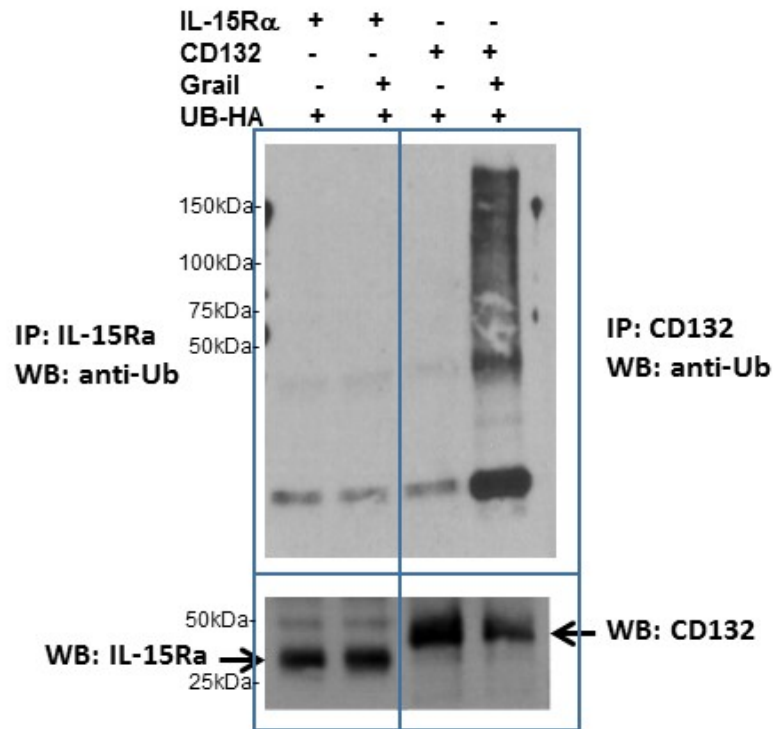

**Supplementary Figure 12: Grail controls common gamma chain ubiquitination but not IL-15R $\alpha$ .** 293T cells were transfected with vectors encoding CD132 or IL-15R $\alpha$ , HA-Ub, and Grail. The lysates were subjected to immunoprecipitation (i.p.) using anti-IL-15R $\alpha$  or anti-CD132 antibodies. The blots were probed with anti-HA-HRP and re-probed with anti-IL-15R $\alpha$  or anti-CD132. All experiments were independently performed twice.

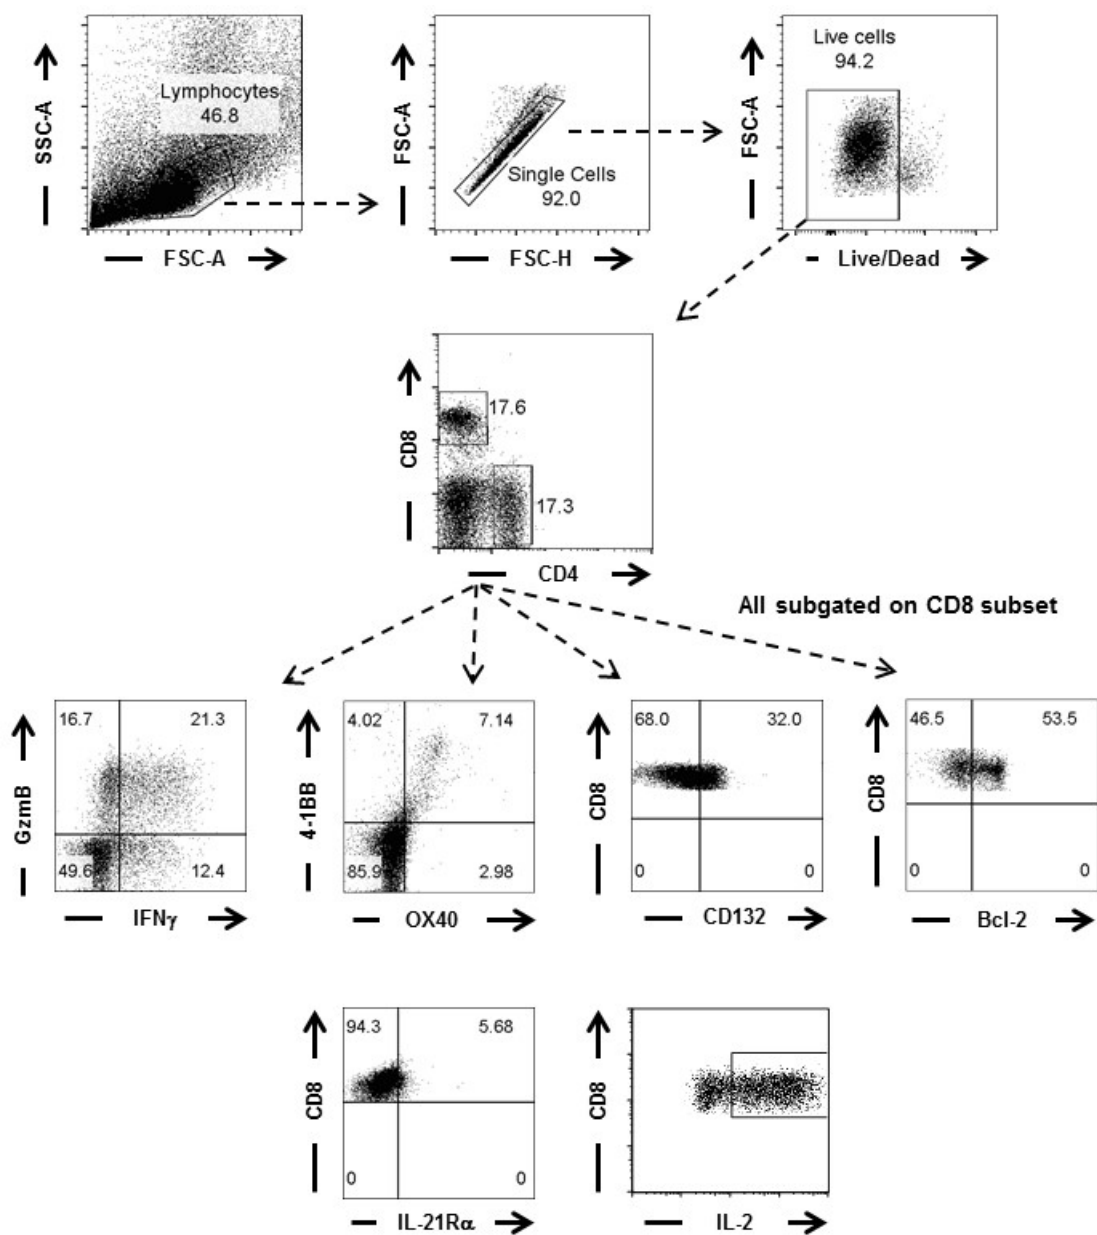

**Supplementary Figure 13: Gating strategy for CD8<sup>+</sup> T cell phenotyping.** For all *in vivo* and *in vitro* assays, CD8<sup>+</sup> T cell phenotyping was performed using the above flow cytometry gating logic.

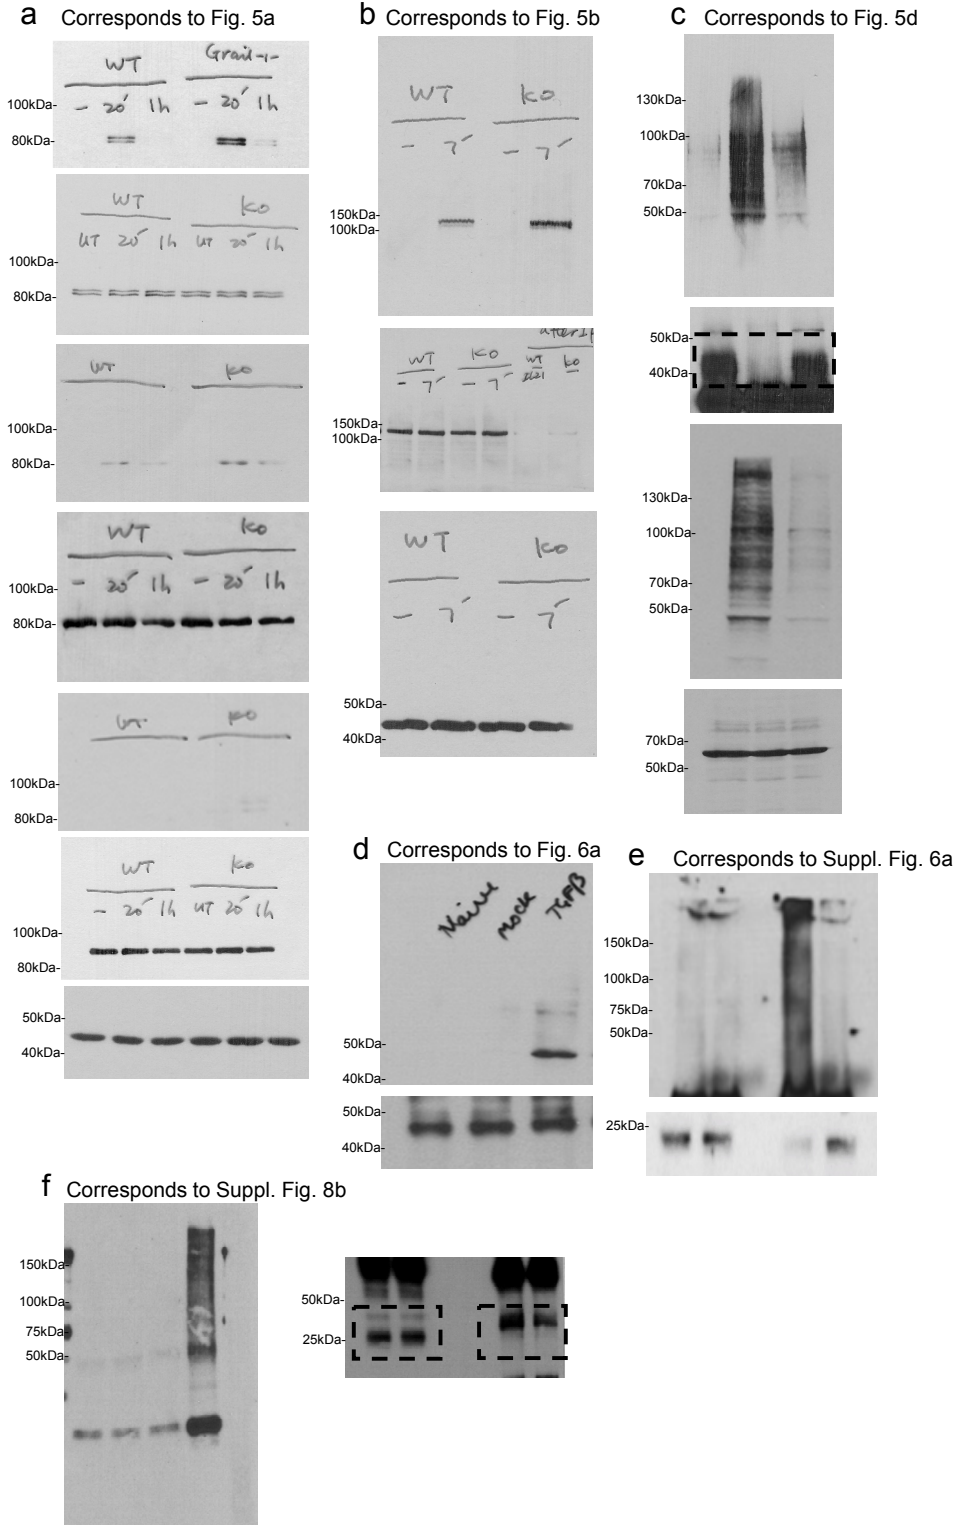

**Supplementary Figure 14: Uncropped gel images for western blot and ubiquitination assays. (a-f) shows the uncropped gel images along with the associated main or supplementary figure reference.**
